# Supplementary material
Source: MDPI journal article supplement (https://www.mdpi.com/2072-4292/13/16/3287)
Supplement: s1 [file s1]

## Supplementary Information

**Table S1** - Results from the preliminary analysis used to select the most important features for biomod2 image ensemble classification with the total 108 variables (X12 – December; X01 – January; X02 – February; X03 – March; X04 – April; X05 – May; the name suffix is Sentinel-2's band position).

| Rank | Variables acronyms | Average variable importance | Importance std-deviation |
|------|--------------------|-----------------------------|--------------------------|
| 1    | X12_b12            | 0.1378                      | 0.2061                   |
| 2    | X01_b2             | 0.1241                      | 0.1093                   |
| 3    | X01_lai            | 0.1202                      | 0.1838                   |
| 4    | X04_b3             | 0.0981                      | 0.1316                   |
| 5    | X03_b3             | 0.0847                      | 0.1620                   |
| 6    | X12_b11            | 0.0800                      | 0.1313                   |
| 7    | X02_b9             | 0.0703                      | 0.1339                   |
| 8    | X12_b1             | 0.0668                      | 0.0844                   |
| 9    | X02_b12            | 0.0660                      | 0.1326                   |
| 10   | X03_b1             | 0.0634                      | 0.1179                   |
| 11   | X05_b3             | 0.0615                      | 0.1272                   |
| 12   | X12_b3             | 0.0574                      | 0.1041                   |
| 13   | X04_b21            | 0.0544                      | 0.0656                   |
| 14   | X02_b3             | 0.0541                      | 0.0863                   |
| 15   | X12_b4             | 0.0488                      | 0.0752                   |
| 16   | X03_lai            | 0.0460                      | 0.0906                   |
| 17   | X12_lai            | 0.0460                      | 0.0974                   |
| 18   | X02_b5             | 0.0425                      | 0.0786                   |
| 19   | X05_b9             | 0.0421                      | 0.1079                   |
| 20   | X05_b2             | 0.0412                      | 0.0836                   |
| 21   | X01_b12            | 0.0412                      | 0.1024                   |
| 22   | X12_b9             | 0.0397                      | 0.1178                   |
| 23   | X05_b8a            | 0.0378                      | 0.0878                   |
| 24   | X03_b2             | 0.0350                      | 0.0763                   |
| 25   | X01_b8             | 0.0344                      | 0.1120                   |
| 26   | X01_b6             | 0.0336                      | 0.0907                   |
| 27   | X03_b7             | 0.0336                      | 0.0661                   |
| 28   | X01_b11            | 0.0336                      | 0.0821                   |
| 29   | X02_mcari          | 0.0328                      | 0.0449                   |
| 30   | X02_b6             | 0.0312                      | 0.0710                   |
| 31   | X01_b8a            | 0.0303                      | 0.1124                   |
| 32   | X12_evi            | 0.0298                      | 0.1408                   |
| 33   | X05_evi            | 0.0294                      | 0.0963                   |
| 34   | X03_b6             | 0.0294                      | 0.0679                   |

|    |            |        |        |
|----|------------|--------|--------|
| 35 | X04_b4     | 0.0284 | 0.0628 |
| 36 | X05_b8     | 0.0277 | 0.0797 |
| 37 | X05_1      | 0.0272 | 0.0642 |
| 38 | X05_b6     | 0.0270 | 0.0618 |
| 39 | X03_b9     | 0.0261 | 0.0898 |
| 40 | X12_msavi  | 0.0256 | 0.0672 |
| 41 | X02_ndvi   | 0.0254 | 0.1060 |
| 42 | X04_b6     | 0.0250 | 0.0542 |
| 43 | X02_b8a    | 0.0244 | 0.0821 |
| 44 | X01_ndvi   | 0.0229 | 0.0792 |
| 45 | X04_8a     | 0.0223 | 0.0614 |
| 46 | X02_b11    | 0.0221 | 0.0510 |
| 47 | X02_b7     | 0.0220 | 0.0724 |
| 48 | X04_b5     | 0.0216 | 0.0492 |
| 49 | X01_b9     | 0.0206 | 0.0703 |
| 50 | X12_b8     | 0.0206 | 0.0630 |
| 51 | X01_msavi2 | 0.0194 | 0.0575 |
| 52 | X02_evi    | 0.0192 | 0.0753 |
| 53 | X03_evi    | 0.0188 | 0.0900 |
| 54 | X03_b11    | 0.0188 | 0.0589 |
| 55 | X04_ndvi   | 0.0183 | 0.0909 |
| 56 | X03_b12    | 0.0180 | 0.0688 |
| 57 | X01_b5     | 0.0176 | 0.0500 |
| 58 | X02_b4     | 0.0173 | 0.0570 |
| 59 | X03_b8a    | 0.0172 | 0.0546 |
| 60 | X01_b1     | 0.0169 | 0.0373 |
| 61 | X04_lai    | 0.0157 | 0.0418 |
| 62 | X04_b11    | 0.0157 | 0.0535 |
| 63 | X05_b4     | 0.0146 | 0.0672 |
| 64 | X03_b8     | 0.0136 | 0.0448 |
| 65 | X12_ndvi   | 0.0135 | 0.0731 |
| 66 | X01_mcari  | 0.0133 | 0.0310 |
| 67 | X03_b5     | 0.0130 | 0.0527 |
| 68 | X05_11     | 0.0128 | 0.0328 |
| 69 | X01_evi    | 0.0126 | 0.0739 |
| 70 | X01_b7     | 0.0125 | 0.0619 |
| 71 | X04_b12    | 0.0121 | 0.0373 |
| 72 | X02_msavi2 | 0.0120 | 0.0694 |
| 73 | X02_lai    | 0.0120 | 0.0344 |
| 74 | X12_b2     | 0.0119 | 0.0527 |
| 75 | X01_b4     | 0.0118 | 0.0378 |

|     |            |        |        |
|-----|------------|--------|--------|
| 76  | X04_msavi2 | 0.0113 | 0.0506 |
| 77  | X12_b5     | 0.0112 | 0.0412 |
| 78  | X05_b7     | 0.0111 | 0.0439 |
| 79  | X04_b9     | 0.0111 | 0.0308 |
| 80  | X03_b4     | 0.0104 | 0.0431 |
| 81  | X05_b12    | 0.0103 | 0.0391 |
| 82  | X05_ndvi   | 0.0102 | 0.0423 |
| 83  | X05_lai    | 0.0101 | 0.0303 |
| 84  | X12_mcari  | 0.0099 | 0.0307 |
| 85  | X02_b8     | 0.0093 | 0.0377 |
| 86  | X04_mtc    | 0.0088 | 0.0232 |
| 87  | X04_b1     | 0.0085 | 0.0238 |
| 88  | X03_mcari  | 0.0085 | 0.0282 |
| 89  | X12_b6     | 0.0082 | 0.0332 |
| 90  | X02_b1     | 0.0081 | 0.0272 |
| 91  | X04_mcari  | 0.0078 | 0.0359 |
| 92  | X04_b8     | 0.0077 | 0.0341 |
| 93  | X01_mtc    | 0.0076 | 0.0184 |
| 94  | X12_b8a    | 0.0073 | 0.0335 |
| 95  | X02_b2     | 0.0071 | 0.0258 |
| 96  | X04_b7     | 0.0066 | 0.0269 |
| 97  | X03_mtc    | 0.0065 | 0.0139 |
| 98  | X03_msavi2 | 0.0055 | 0.0194 |
| 99  | X03_ndvi   | 0.0054 | 0.0283 |
| 100 | X02_mtc    | 0.0050 | 0.0129 |
| 101 | X12_b7     | 0.0048 | 0.0267 |
| 102 | X12_mtc    | 0.0047 | 0.0158 |
| 103 | X01_b3     | 0.0032 | 0.0106 |
| 104 | X05_b5     | 0.0023 | 0.0114 |
| 105 | X04_evi    | 0.0000 | 0.0000 |
| 106 | x05_mtc    | 0.0000 | 0.0000 |
| 107 | x05_msavi  | 0.0000 | 0.0000 |
| 108 | x05_mcari  | 0.0000 | 0.0000 |

**Table S2** - Performance evaluation scores from the preliminary analysis.

| Performance statistic | Value | Cutoff | Sensitivity | Specificity |
|-----------------------|-------|--------|-------------|-------------|
| KAPPA                 | 0.925 | 721    | 93.981      | 98.2        |
| TSS                   | 0.938 | 615    | 97.377      | 96.399      |
| ROC                   | 0.995 | 636.5  | 96.914      | 96.914      |

**Table S3** – Average driver importance ranking for all variables tested (ordered in descendent fashion).

| Variable type                     | Variable acronym | Description                                                       | Average Importance |
|-----------------------------------|------------------|-------------------------------------------------------------------|--------------------|
| Climate                           | CL_BIO06         | BIO6 - Min Temperature of Coldest Month                           | 854.3              |
| Land use                          | LU_PCEFO         | Percent cover of eucalyptus (production) forest                   | 853.5              |
| Climate                           | CL_BIO08         | BIO8 - Mean Temperature of Wettest Quarter                        | 831.5              |
| Climate                           | CL_BIO04         | BIO4 - Temperature Seasonality (standard deviation $\times 100$ ) | 734.1              |
| Climate                           | CL_BIO15         | BIO15 - Precipitation Seasonality (Coefficient of Variation)      | 575.7              |
| Land use                          | LU_PCSHL         | Percent cover of shrublands                                       | 519.9              |
| Land use                          | LU_PCOPF         | Percent cover of other production forests                         | 463.3              |
| Landscape pattern / heterogeneity | LP_MNPAR         | Landscape Mean Patch Area                                         | 370.0              |
| Landscape pattern / heterogeneity | LP_SPDVI         | Landscape Simpson Diversity                                       | 360.2              |
| Land use                          | LU_PCPFO         | Percent cover of maritime-pine (production) forest                | 338.5              |
| Landscape pattern / heterogeneity | LP_SHDVI         | Landscape Shannon Diversity                                       | 310.8              |
| Topography / Geomorphology        | TG_TOWTI         | Topographic Wetness Index                                         | 294.6              |
| Landscape pattern / heterogeneity | LP_PASTD         | Landscape Patch Area Standard-deviation                           | 271.3              |
| Topography / Geomorphology        | TG_SLOPE         | Slope                                                             | 258.9              |
| Topography / Geomorphology        | TG_TORGI         | Topographic Rugdness Index                                        | 250.1              |
| Land use                          | LU_PCACO         | Percent cover of annual crops                                     | 243.2              |
| Climate                           | CL_BIO18         | BIO18 - Precipitation of Warmest Quarter                          | 196.3              |
| Climate                           | CL_BIO17         | BIO17 - Precipitation of Driest Quarter                           | 194.0              |
| Disturbance                       | DT_BA20YR        | Total Burnt Area (last 20 years)                                  | 190.3              |
| Landscape pattern / heterogeneity | LP_LAPAI         | Landscape Largest Patch Index                                     | 186.4              |
| Disturbance                       | DT_BA10YR        | Total Burnt Area (last 10 years)                                  | 161.8              |
| Linear elements                   | LE_EDGDN         | Landscape edge density                                            | 156.9              |
| Disturbance                       | DT_BA5YR         | Total Burnt Area (last 5 years)                                   | 151.5              |
| Topography / Geomorphology        | TG_RADAV         | Average Solar Radiation                                           | 149.6              |
| Soil properties                   | SO_PCLAY         | Percent of clay in soils                                          | 143.8              |

|                                   |          |                                               |       |
|-----------------------------------|----------|-----------------------------------------------|-------|
| Land use                          | LU_PCART | Percent cover of artificial/urban areas       | 141.8 |
| Soil properties                   | SO_BULKD | Bulk Density                                  | 139.9 |
| Soil properties                   | SO_PSAND | Percent of sand in soils                      | 131.5 |
| Soil properties                   | SO_PSILT | Percent of silt in soils                      | 130.4 |
| Linear elements                   | LE_TLMTW | Total length of motorways                     | 126.4 |
| Landscape pattern / heterogeneity | LP_PACOV | Landscape Patch Area Coefficient of variation | 123.5 |
| Linear elements                   | LE_TLROD | Total length of all road types                | 115.5 |
| Soil properties                   | SO_AVWTC | Available water content                       | 110.3 |
| Linear elements                   | LE_TLRIV | Total length of rivers                        | 106.0 |
| Land use                          | LU_PCRRL | Percent cover of roads and rails              | 105.4 |
| Soil properties                   | SO_PCOAR | Percent of coarse elements in soils           | 95.3  |
| Land use                          | LU_PCNFO | Percent cover of native forests               | 93.1  |
| Land use                          | LU_PCWET | Percent cover of wetlands                     | 84.8  |
| Land use                          | LU_PCAFM | Percent cover of complex agroforestry mosaics | 73.5  |
| Land use                          | LU_PCPCO | Percent cover of permanent crops              | 39.7  |
| Land use                          | LU_PCWTS | Percent cover of water surfaces               | 35.5  |
| Land use                          | LU_PCPAC | Percent cover of permanent and annual crops   | 22.0  |
| Land use                          | LU_PCBSD | Percent cover of beaches and sand dunes       | 13.7  |
| Land use                          | LU_PCSPV | Percent cover of sparsely vegetated areas     | 9.9   |
| Land use                          | LU_PCPAS | Percent cover of pasturelands                 | 6.6   |
| Land use                          | LU_PCBRS | Percent cover of bare rock surfaces           | 0.8   |

**Table S4** – Driver importance ranking for the 20-best selected variables for the final random forest model (ordered in descendent fashion).

| Variable type                     | Variable acronym | Description                                                       | Average Importance | Std-deviation |
|-----------------------------------|------------------|-------------------------------------------------------------------|--------------------|---------------|
| Climate                           | CL_BIO06         | BIO6 - Min Temperature of Coldest Month                           | 1243.9             | 49.2          |
| Land use                          | LU_PCEFO         | Percent cover of eucalyptus (production) forest                   | 1133.7             | 67.8          |
| Climate                           | CL_BIO04         | BIO4 - Temperature Seasonality (standard deviation $\times 100$ ) | 1072.3             | 46.0          |
| Land use                          | LU_PCSHL         | Percent cover of shrublands                                       | 816.8              | 46.4          |
| Climate                           | CL_BIO15         | BIO15 - Precipitation Seasonality (Coefficient of Variation)      | 805.7              | 42.3          |
| Land use                          | LU_PCOPF         | Percent cover of other production forests                         | 637.0              | 44.8          |
| Landscape pattern / heterogeneity | LP_MNPAR         | Landscape Mean Patch Area                                         | 609.9              | 41.9          |
| Landscape pattern / heterogeneity | LP_SPDVI         | Landscape Simpson Diversity                                       | 583.4              | 42.5          |
| Land use                          | LU_PCPFO         | Percent cover of maritime-pine (production) forest                | 505.5              | 27.2          |
| Climate                           | CL_BIO18         | BIO18 - Precipitation of Warmest Quarter                          | 435.7              | 25.2          |
| Land use                          | LU_PCACO         | Percent cover of annual crops                                     | 407.3              | 29.7          |
| Soil properties                   | SO_PCLAY         | Percent of clay in soils                                          | 400.5              | 30.6          |
| Land use                          | LU_PCART         | Percent cover of artificial/urban areas                           | 311.9              | 19.5          |
| Topography / Geomorphology        | TG_RADAV         | Average Solar Radiation                                           | 307.6              | 28.2          |
| Disturbance                       | DT_BA5YR         | Total Burnt Area (last 5 years)                                   | 296.3              | 26.1          |
| Soil properties                   | SO_AVWTC         | Available water content                                           | 240.3              | 18.2          |
| Landscape pattern / heterogeneity | LP_PACOV         | Landscape Patch Area Coefficient of variation                     | 236.9              | 19.2          |
| Soil properties                   | SO_PCOAR         | Percent of coarse elements in soils                               | 215.3              | 17.0          |
| Linear elements                   | LE_TLMTW         | Total length of motorways                                         | 214.3              | 19.0          |
| Linear elements                   | LE_TLRIV         | Total length of rivers                                            | 213.7              | 15.1          |

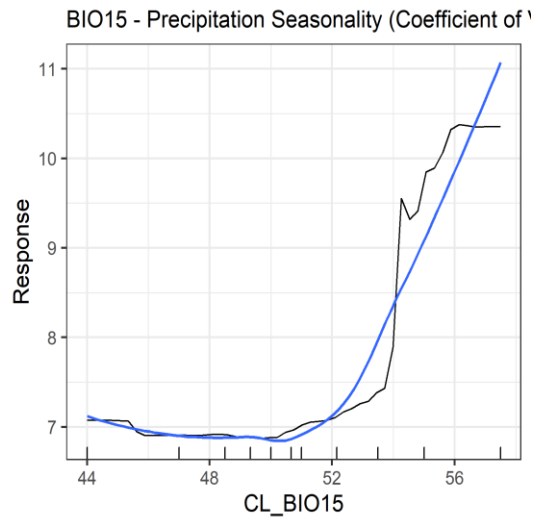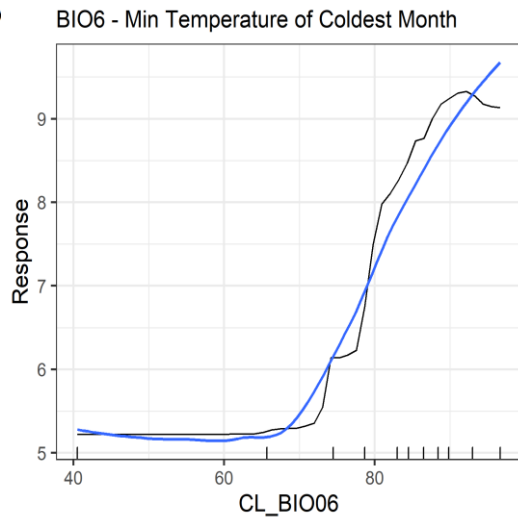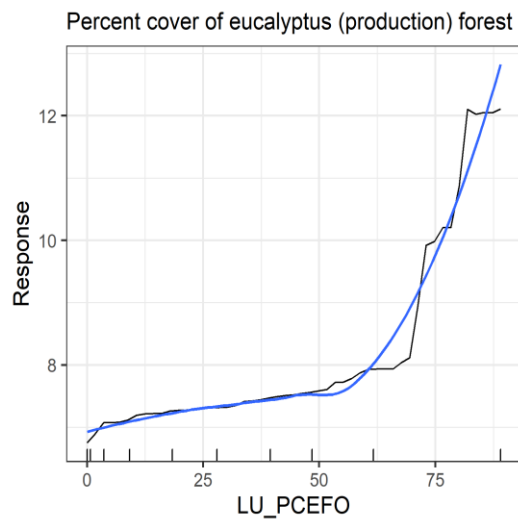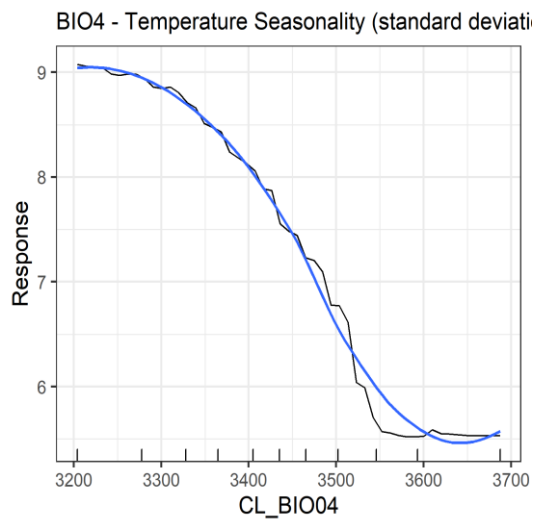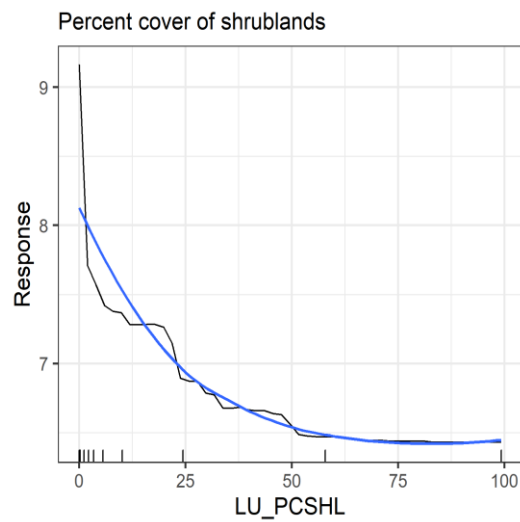

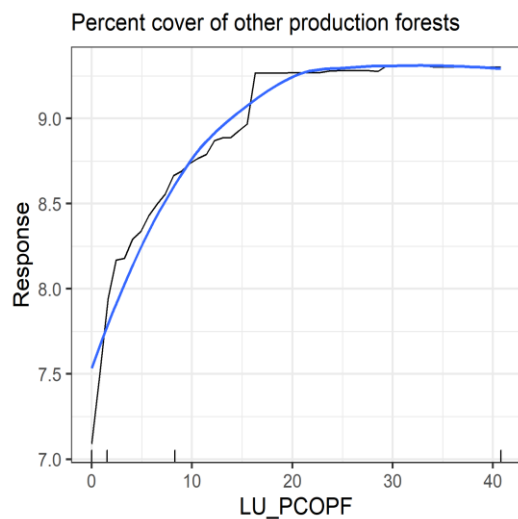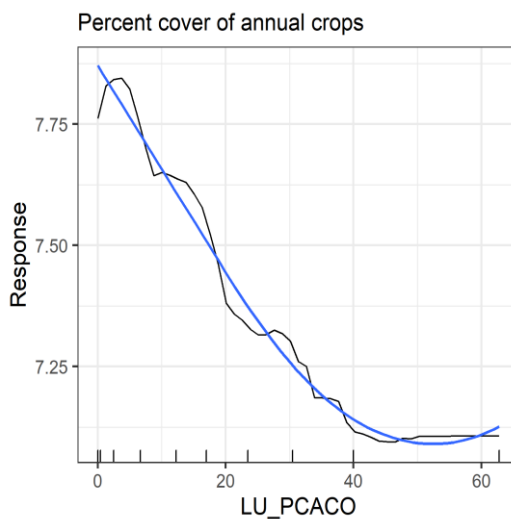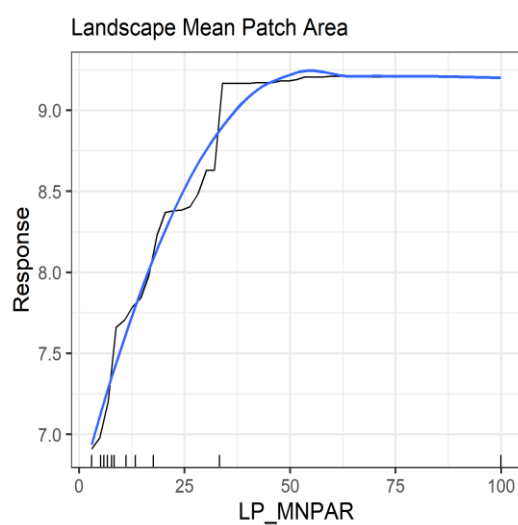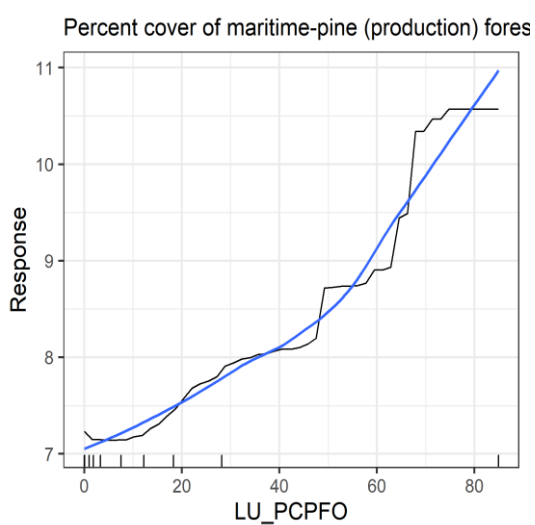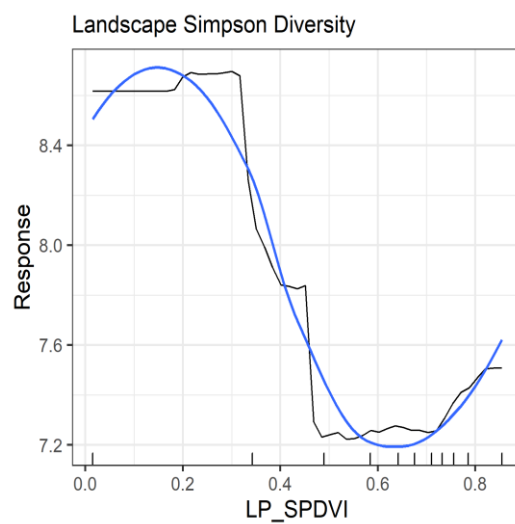



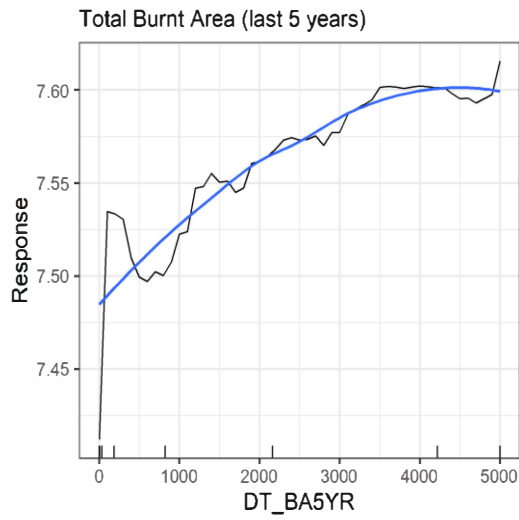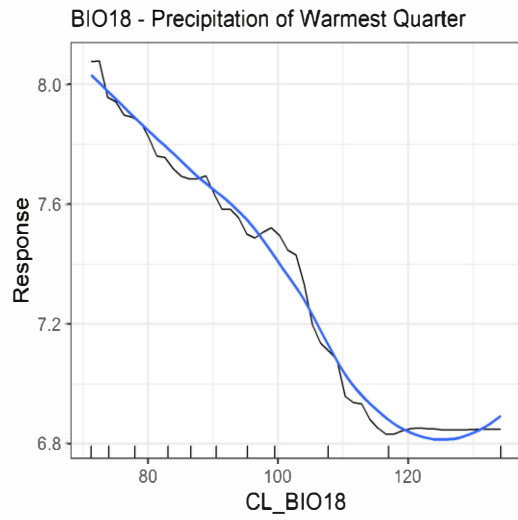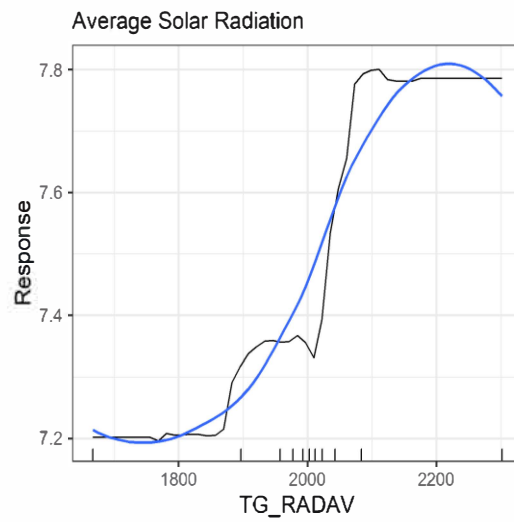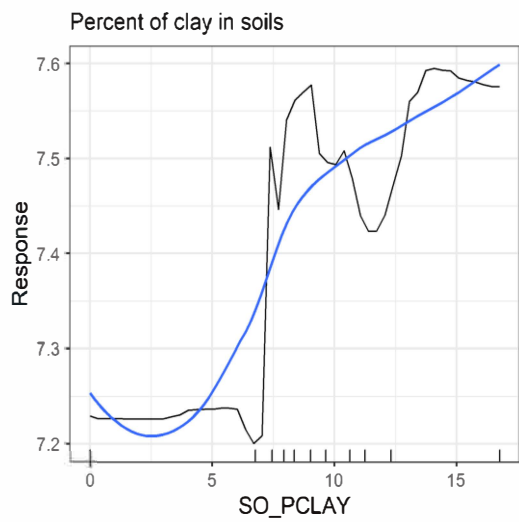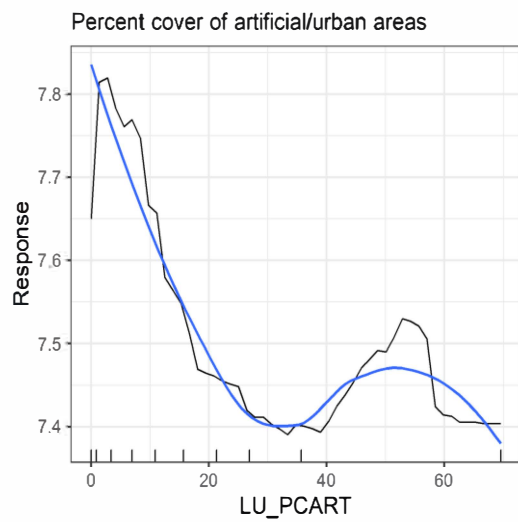

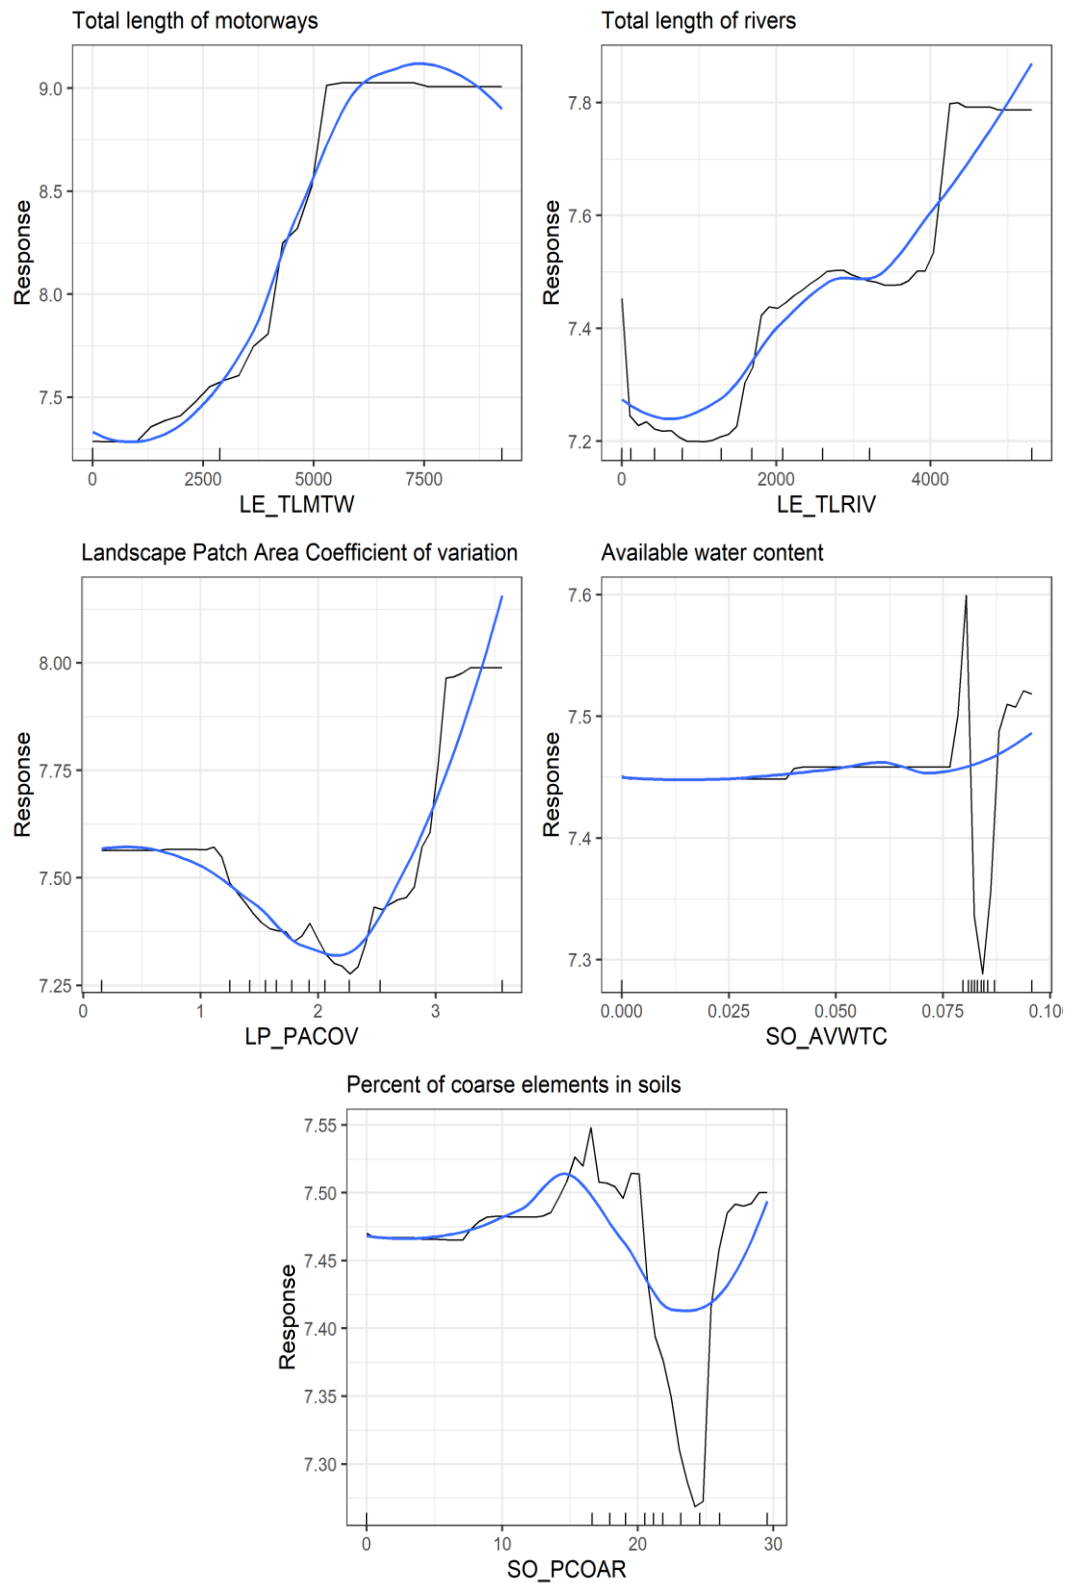

**Figure S1** – Partial dependence plots for all variables used in RF models, showing the relation between the response variable (abundance given by the percentage of invaded area, in the y-axis) and the selected predictive variables of different environmental factors (x-axis). The black line indicates the “raw” response from the RF model, while the blue line applies a moving average smooth.
